# Supplementary material
Source: HighWire-hosted journal article supplement (https://heart.bmj.com/content/106/11/830)
Supplement: inline-supplementary-material-1 [file inline-supplementary-material-1.pdf]

| <b>Supplemental Table 1. Univariate and multivariate correlates of symptom status (NYHA Class <math>\geq 2</math>) prior to AVR</b> |                     |           |                              |           |
|-------------------------------------------------------------------------------------------------------------------------------------|---------------------|-----------|------------------------------|-----------|
| Term                                                                                                                                | Univariate analysis |           | Multivariable analysis       |           |
|                                                                                                                                     | Odds Ratio (95% CI) | p - value | Adjusted Odds Ratio (95% CI) | p - value |
| Female sex                                                                                                                          | 1.50 (1.14-1.97)    | 0.004     | 1.93 (1.42-2.62)             | <0.001    |
| Age, years*                                                                                                                         | 1.21 (1.06-1.38)    | 0.003     | 1.35 (1.16-1.57)             | <0.001    |
| BMI, m <sup>2†</sup>                                                                                                                | 1.06 (1.04-1.09)    | <0.001    | 1.04 (1.02-1.08)             | 0.001     |
| Coronary artery disease                                                                                                             | 1.57 (1.21-2.04)    | <0.001    | 1.78 (1.34-2.37)             | <0.001    |
| Concomitant CABG                                                                                                                    | 1.53 (1.16-2.02)    | 0.002     |                              |           |
| Congestive heart failure                                                                                                            | 2.26 (1.62-3.16)    | <0.001    | 2.25 (1.58-3.20)             | <0.001    |
| Preoperative creatinine, mg/dL‡                                                                                                     | 1.05 (0.81-1.37)    | 0.719     |                              |           |
| LV ejection fraction§                                                                                                               | 1.18 (1.06-1.31)    | 0.003     | 1.21 (1.08-1.36)             | <0.001    |
| Stroke volume index, mL/m <sup>2  </sup>                                                                                            | 1.10 (0.94-1.28)    | 0.022     |                              |           |
| LV hypertrophy                                                                                                                      | 1.26 (0.96-1.64)    | 0.097     |                              |           |
| Aortic valve peak systolic velocity, m/s#                                                                                           | 1.18 (1.06-1.32)    | 0.004     |                              |           |
| Aortic valve area, cm <sup>2††</sup>                                                                                                | 1.12 (1.02-1.24)    | 0.017     | 1.16 (1.04-1.30)             | 0.007     |
| Increased LV filling pressure‡‡                                                                                                     | 1.76 (1.24-2.52)    | 0.002     | 1.77 (1.24-2.52)             | 0.002     |

\*Per 10 year increase; †Per 1 m<sup>2</sup> decrease; ‡Per 1 mg/dL increase; §Per 5% decrease; ||Per 10 mL/m<sup>2</sup> decrease; #Per 0.5 m/s decrease; \*\*Per 10mmHg increase; ††Per 0.1 cm<sup>2</sup> decrease; ‡‡Compared to normal LV filling pressure

Abbreviations: BMI, body mass index; CABG, coronary artery bypass grafting; COPD, chronic obstructive pulmonary disease; LAP, left atrial pressure; LV, left ventricular; NYHA, New York Heart Association
