# Supplementary material
Source: HighWire-hosted journal article supplement (https://heart.bmj.com/content/106/11/830)
Supplement: inline-supplementary-material-2 [file inline-supplementary-material-2.pdf]

| <b>Supplemental Table 2. Univariate and multi-variable cox proportional hazard ratios for risk of mortality after aortic valve replacement, after propensity weighting</b> |                       |           |                                |           |
|----------------------------------------------------------------------------------------------------------------------------------------------------------------------------|-----------------------|-----------|--------------------------------|-----------|
| Term                                                                                                                                                                       | Univariate analysis   |           | Multivariable analysis         |           |
|                                                                                                                                                                            | Hazard Ratio (95% CI) | p - value | Adjusted Hazard Ratio (95% CI) | p - value |
| Female sex                                                                                                                                                                 | 0.87 (0.68-1.11)      | 0.266     |                                |           |
| Age, years*                                                                                                                                                                | 1.58 (1.38-1.82)      | <0.001    | 1.63 (1.41-1.90)               | <0.001    |
| NYHA Class 3-4                                                                                                                                                             | 1.38 (1.05-1.81)      | 0.022     | 1.71 (1.28-2.27)               | <0.001    |
| Hypertension                                                                                                                                                               | 1.14 (0.84-1.55)      | 0.410     |                                |           |
| Coronary artery disease                                                                                                                                                    | 1.44 (1.13-1.84)      | 0.003     |                                |           |
| Concomitant CABG                                                                                                                                                           | 1.33 (1.04-1.69)      | 0.022     |                                |           |
| Congestive heart failure                                                                                                                                                   | 1.90 (1.48-2.43)      | <0.001    | 1.39 (1.08-1.80)               | 0.012     |
| Diabetes                                                                                                                                                                   | 1.55 (1.21-1.97)      | <0.001    | 1.37 (1.06-1.77)               | 0.016     |
| COPD                                                                                                                                                                       | 2.07 (1.57-2.74)      | <0.001    | 1.88 (1.41-2.50)               | <0.001    |
| Preoperative creatinine, mg/dL <sup>†</sup>                                                                                                                                | 1.61 (1.31-1.99)      | <0.001    | 1.52 (1.18-1.96)               | 0.001     |
| LV ejection fraction <sup>‡</sup>                                                                                                                                          | 1.12 (1.02-1.24)      | 0.019     |                                |           |
| Stroke volume index, mL/m <sup>2</sup> <sup>§</sup>                                                                                                                        | 1.30 (1.12-1.51)      | <0.001    | 1.26 (1.07-1.47)               | 0.005     |
| LV hypertrophy                                                                                                                                                             | 1.21 (0.93-1.58)      | 0.150     |                                |           |
| LV remodeling                                                                                                                                                              |                       | 0.125     |                                |           |
| Normal                                                                                                                                                                     | -                     | -         |                                |           |

|                                                                                                                                                                                                                                                                                                                                                                                                                                                                                                 |                  |        |                  |       |
|-------------------------------------------------------------------------------------------------------------------------------------------------------------------------------------------------------------------------------------------------------------------------------------------------------------------------------------------------------------------------------------------------------------------------------------------------------------------------------------------------|------------------|--------|------------------|-------|
| Concentric remodeling <sup>  </sup>                                                                                                                                                                                                                                                                                                                                                                                                                                                             | 1.24 (0.76-2.03) | -      |                  |       |
| Concentric hypertrophy <sup>  </sup>                                                                                                                                                                                                                                                                                                                                                                                                                                                            | 1.50 (0.96-2.33) | -      |                  |       |
| Eccentric hypertrophy <sup>  </sup>                                                                                                                                                                                                                                                                                                                                                                                                                                                             | 1.04 (0.58-1.84) | -      |                  |       |
| Aortic valve peak systolic velocity, m/s <sup>¶</sup>                                                                                                                                                                                                                                                                                                                                                                                                                                           | 1.05 (0.94-1.18) | 0.349  |                  |       |
| Aortic valve area, cm <sup>2</sup> <sup>#</sup>                                                                                                                                                                                                                                                                                                                                                                                                                                                 | 1.12 (1.03-1.23) | 0.011  |                  |       |
| Increased LV filling pressure**                                                                                                                                                                                                                                                                                                                                                                                                                                                                 | 1.61 (1.24-2.08) | <0.001 | 1.44 (1.11-1.86) | 0.006 |
| <p>*Per 10 year increase; <sup>†</sup>Per 1 mg/dL increase; <sup>‡</sup>Per 5% decrease; <sup>§</sup>Per 10 mL/m<sup>2</sup> decrease; <sup>  </sup>Compared to normal; <sup>¶</sup>Per 0.5 m/s decrease; <sup>#</sup>Per 0.1 cm<sup>2</sup> decrease; **Compared to normal LV filling pressure</p> <p>Abbreviations: CABG, coronary artery bypass grafting; COPD, chronic obstructive pulmonary disease; LAP, left atrial pressure; LV, left ventricular; NYHA, New York Heart Association</p> |                  |        |                  |       |
